# Supplementary material
Source: PubMed Central journal article supplement (PMC11028200)
Supplement: 262_2017_2089_MOESM1_ESM.pdf [file 262_2017_2089_MOESM1_ESM.pdf]

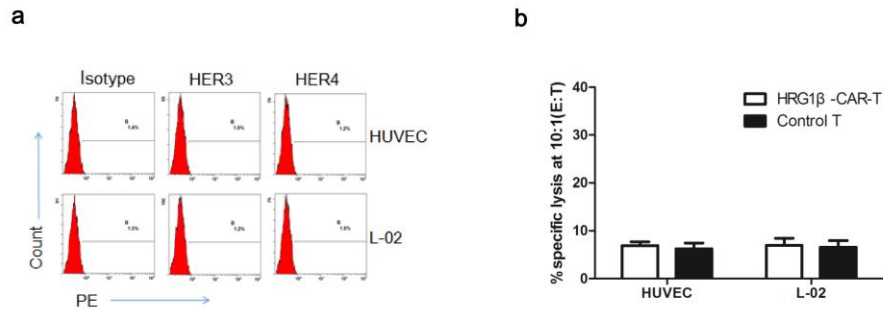

**Supplementary Fig. 1** HRG1 $\beta$ -CAR-T cells do not recognize and kill HER3-negative cells derived from normal tissues.

**a** HUVECs and L02 cells were stained respectively with monoclonal antibodies specific for the HER3/HER4 antigen and analyzed by flow cytometry. **b** Lysis of target cells by control T or HRG1 $\beta$ -CAR-T cells after 4h incubation at the indicated E:T ratio. Data are represented as the mean  $\pm$  SEM of n=3 replicates or representative of three independent experiments.  $P > 0.05$  (Student's *t*-test).
